# Supplementary material for: "El dinero del exilio. Indalecio Prieto y las pugnas de la pos-guerra, 1939-1947"
Source: Royal Society of Chemistry journal article supplement (doi:10.1039/b210164e), 2011-01-01
Supplement: b210164e.doc [file b210164e.doc]

# Electronic Supplementary Information

**Experimental.** All reagents were of analytical grade or better and were used without further purification. A typical synthesis was as follows: 35.0 ml H2O, 1.00 g Ga2O3 or 1.00 g In2O3, 2.00 g NaOH, 4.00 g white phosphor were mixed and added to a 50 ml Teflon-lined autoclave, and then 3.00 g I2 were added. The autoclave was kept at 120~160 °C for 8 h, and then cooled to room-temperature naturally. The products were filtered out, washed with absolute alcohol, 1 N HCl and distilled water in subsequence, and then dried in a vacuum at room temperature for 2 h.

X-ray powder diffraction (XRD) was carried out on a Rigaku D/max-B X-ray diffractometer with Cu Ka radiation (l = 1.54178 Å). TEM images of the samples were obtained from a Hitachi model H800 transmission electron microscope using an accelerating voltage of 200 kV. High-resolution electron microscopy (HRTEM) images of the particles were obtained from a JEOL-2010 transmission electron microscope. The X-ray photoelectron spectra (XPS) was recorded on a VGESCALAB MKII X-ray photoelectron Spectrometer, using non-monochromatized Mg K X-ray as the excitation source. Room temperature UV/vis adsorption spectrum of the products dispersed in water were recorded using a Shimadzu UV-240 UV/vis spectrophotometer. Room temperature photoluminescence (PL) spectra of the products were recorded using a Hitachi 850 fluorescence spectrophotometer in reflection geometry.
